# Supplementary figures and images for: Multi-Strain Probiotic Mixture Affects Brain Morphology and Resting State Brain Function in Healthy Subjects: An RCT
Source: MDPI journal article supplement (doi:10.3390/cells11182922), 2022-09-19

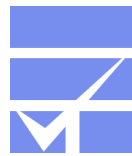

# CONSORT

TRANSPARENT REPORTING of TRIALS

## CONSORT 2010 Flow Diagram

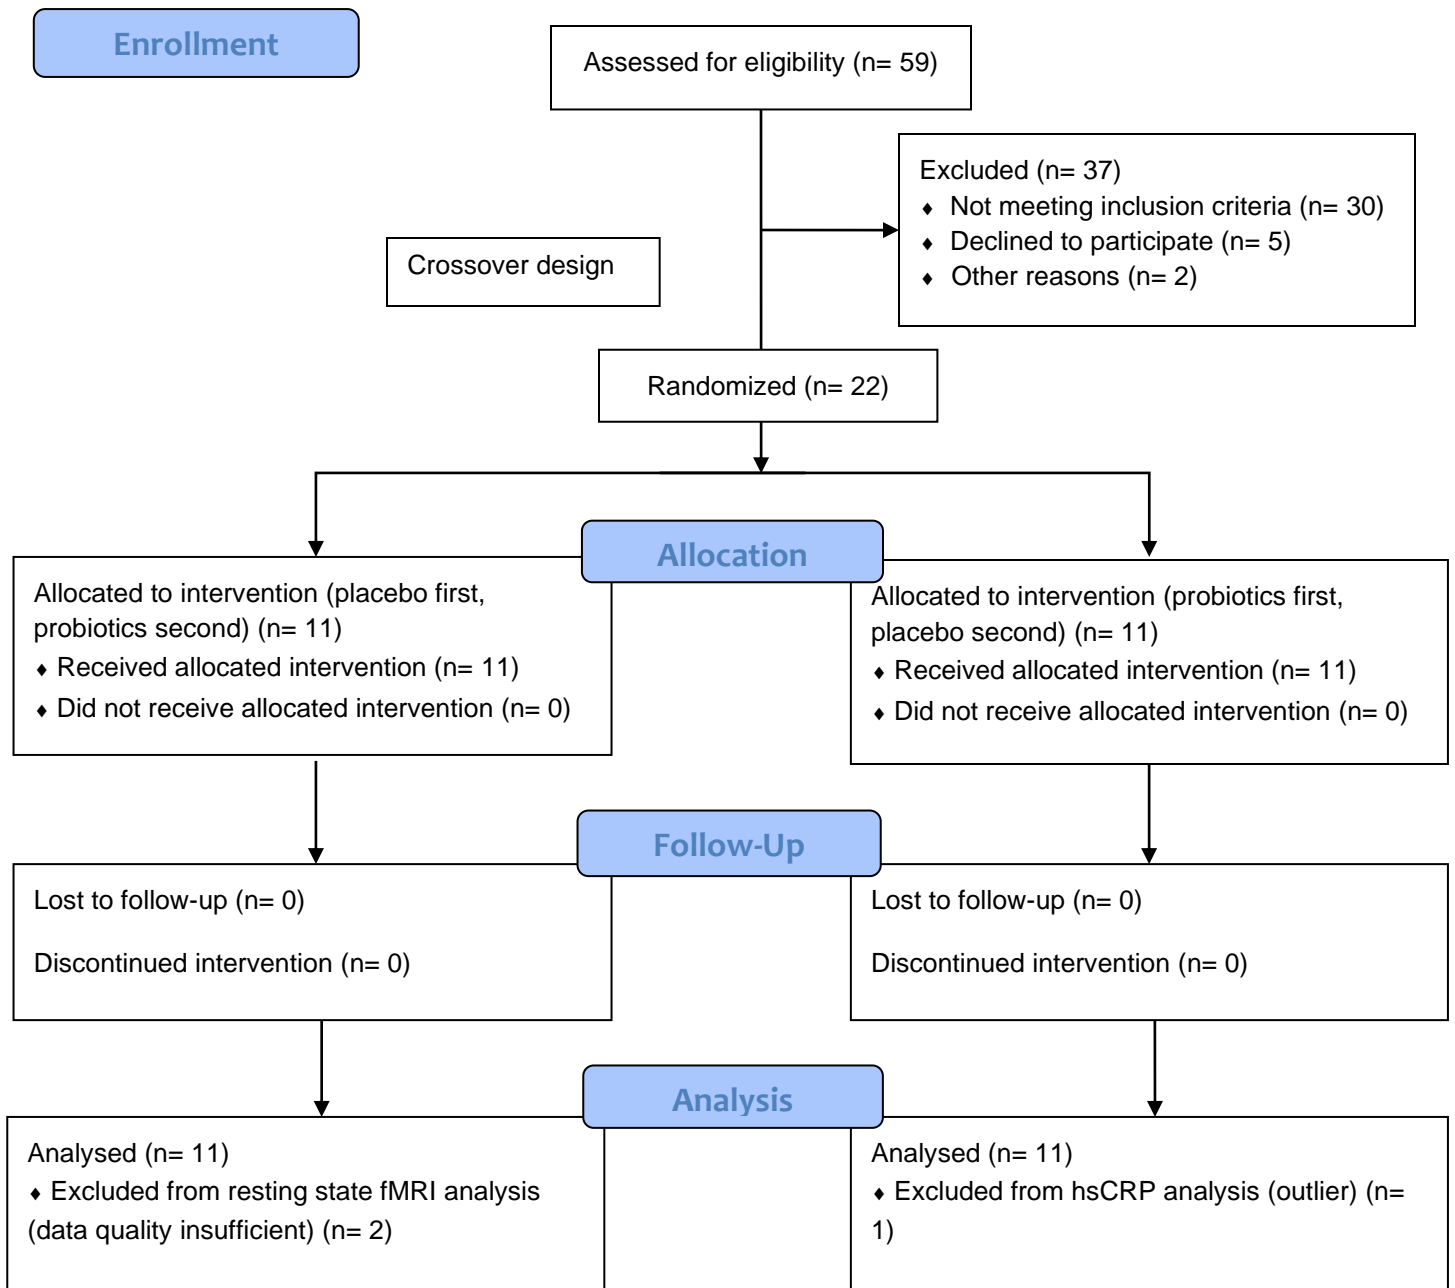

Supplement: s1 [file s1]
